# Supplementary material for: Noncentrosomal microtubules and type II myosins potentiate epidermal cell adhesion and barrier formation
Source: PubMed Central journal article supplement — J Cell Biol. 2012 Oct 29;199(3):513–25. doi: 10.1083/jcb.201206143 (PMC3483132; doi:10.1083/jcb.201206143), 2012-10-29
Supplement: supp_jcb.201206143_JCB_201206143_sm.pdf [file supp_jcb.201206143_JCB_201206143_sm.pdf]

Sumigray et al., <http://www.jcb.org/cgi/content/full/jcb.201206143/DC1>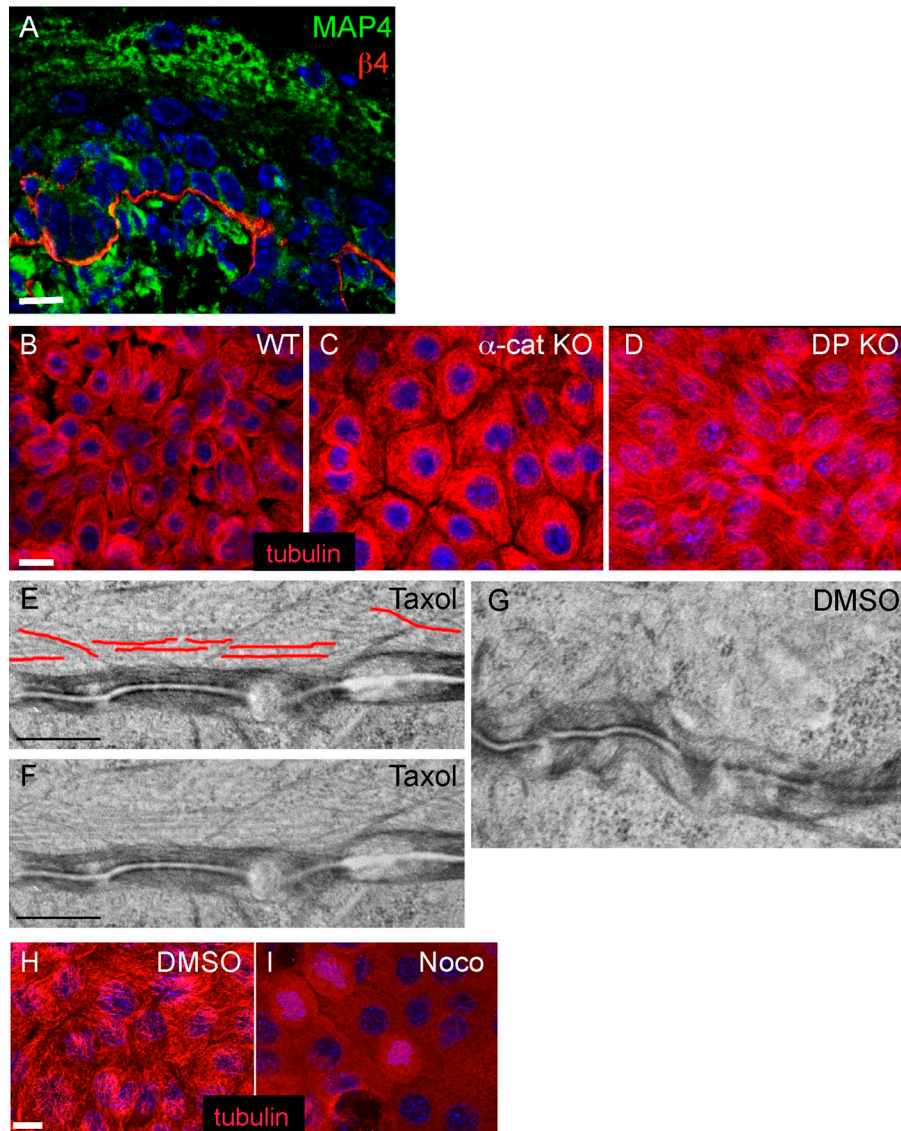

Figure S1. **MAP4 and microtubule organization in epidermis and cultured keratinocytes.** (A) MAP4 (green) localization in the upper differentiated layers of the epidermis.  $\beta$ 4-integrin (red) marks the epidermal–dermal boundary. Bar, 20  $\mu$ m. (B–D)  $\beta$ -Tubulin staining to highlight microtubules in WT (B),  $\alpha$ -catenin–null (C), and desmoplakin–null (D) cells grown in low calcium containing media and treated with taxol. Bar, 10  $\mu$ m. (E–G) Ultrastructural analysis of cultured keratinocytes in taxol-treated (E and F) and control (G) cells. F is the same image as E with highlights for microtubules absent. Bar (E–G) 0.5  $\mu$ m. (H–I) Anti- $\beta$ -tubulin immunofluorescence in control and nocodazole-treated keratinocytes.

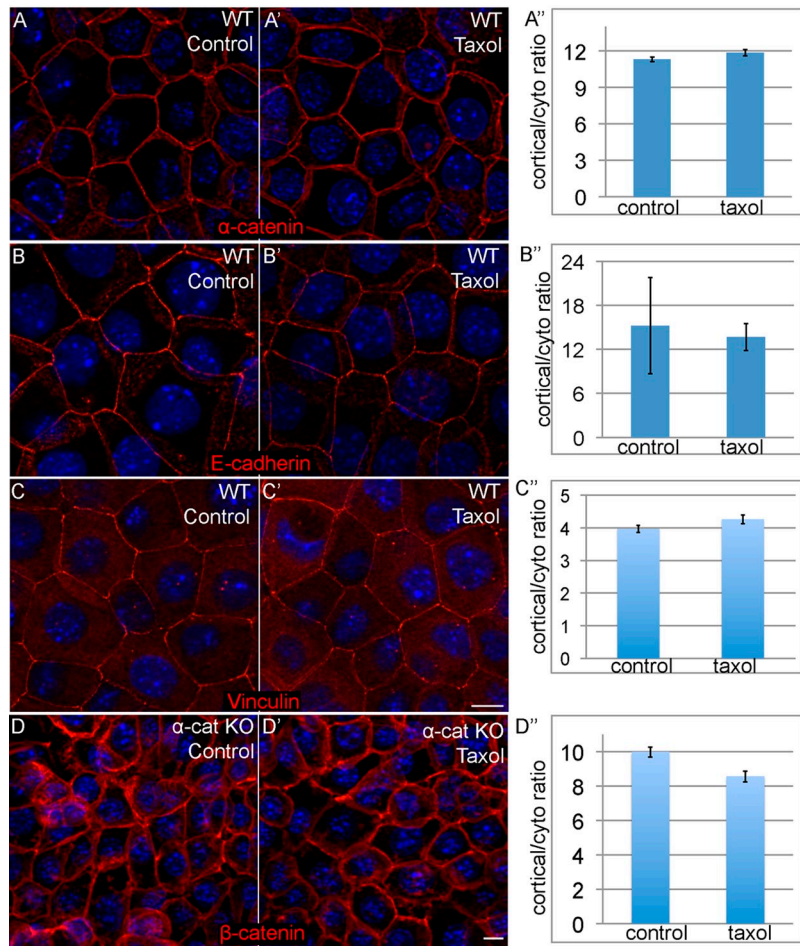

**E**  $\beta$ -catenin IP/ $\alpha$ -catenin null cells

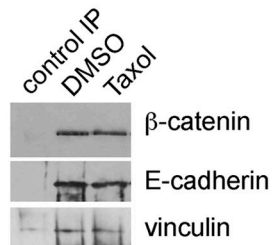

Figure S2. **Localization of cell junction components after taxol treatment.** Immunofluorescence analysis and quantitation of cortical/cytoplasmic ratio of  $\alpha$ -catenin (A–A''), E-cadherin (B–B''), and vinculin (C–C'') in control and taxol-treated cells, as indicated. (D–D'') Localization of  $\beta$ -catenin in  $\alpha$ -catenin-null, control, or taxol-treated cells. Bar, 10  $\mu$ m. (E)  $\beta$ -Catenin was immunoprecipitated from extracts of  $\alpha$ -catenin-null cells (with or without pretreatment with taxol). Composition of complexes was analyzed by Western blotting with E-cadherin,  $\beta$ -catenin, and vinculin antibodies.

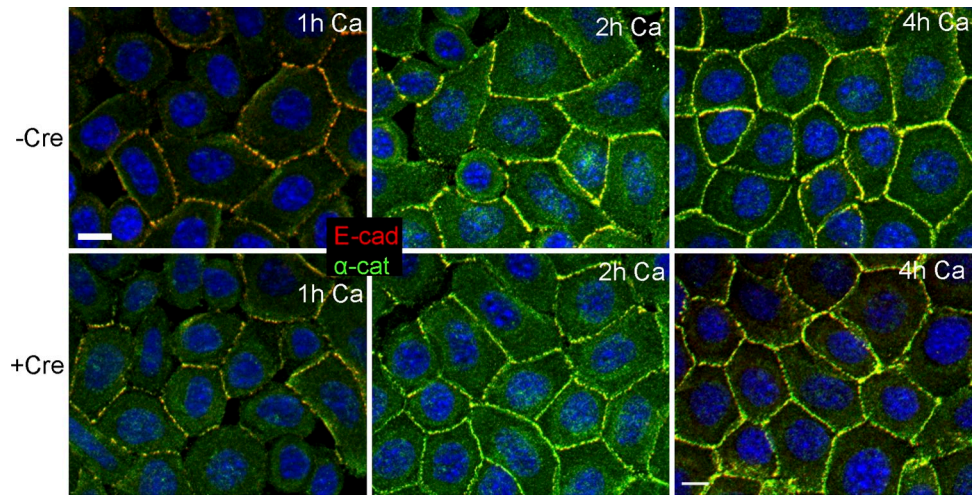

Figure S3. **Normal recruitment of adherens junction proteins to cell junctions in myosin IIA-null keratinocytes.** Myosin IIA fl/fl cells were treated with adenoviral-Cre or left untreated. After 48 h, calcium was added and the localization of E-cadherin (red) and  $\alpha$ -catenin (green) was assessed. Bar, 10  $\mu$ m.

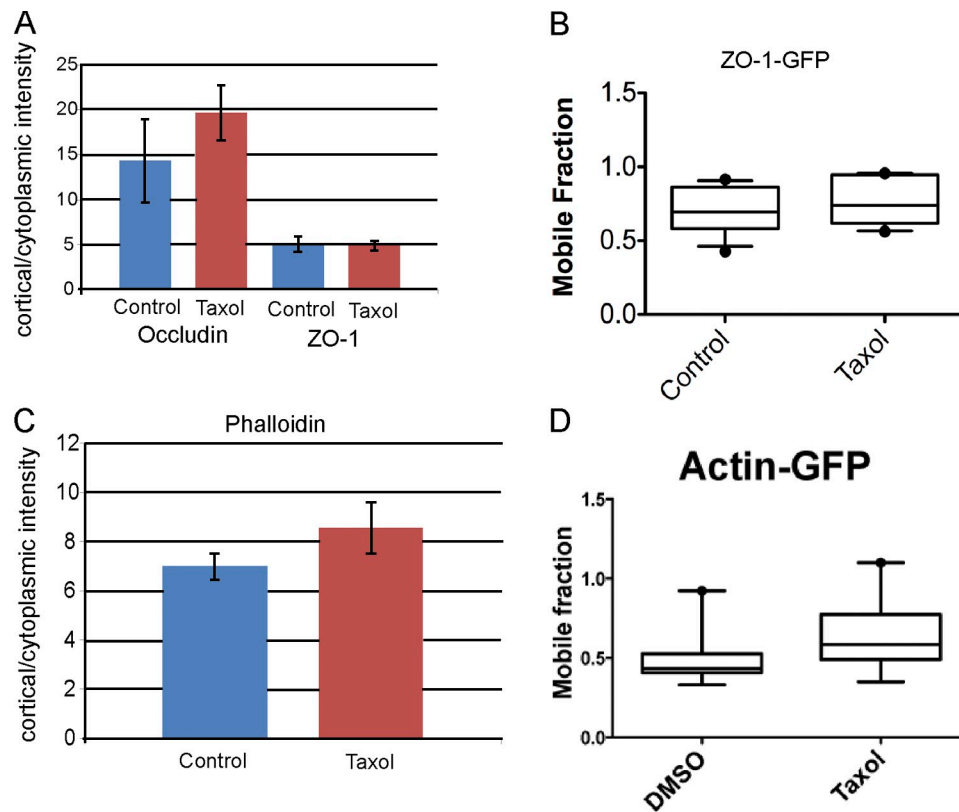

Figure S4. **Localization and turnover of junctional components.** (A) Quantitation of cortical/cytoplasmic fluorescence intensity of occludin and ZO-1 in control and taxol-treated cells. (B) Mobile fraction of ZO-1-GFP as determined by FRAP analysis in control and taxol-treated cells. (C) Quantitation of cortical/cytoplasmic fluorescence intensity of F-actin in control and taxol-treated cells. (D) Mobile fraction of actin-GFP as determined by FRAP analysis in control and taxol-treated cells.



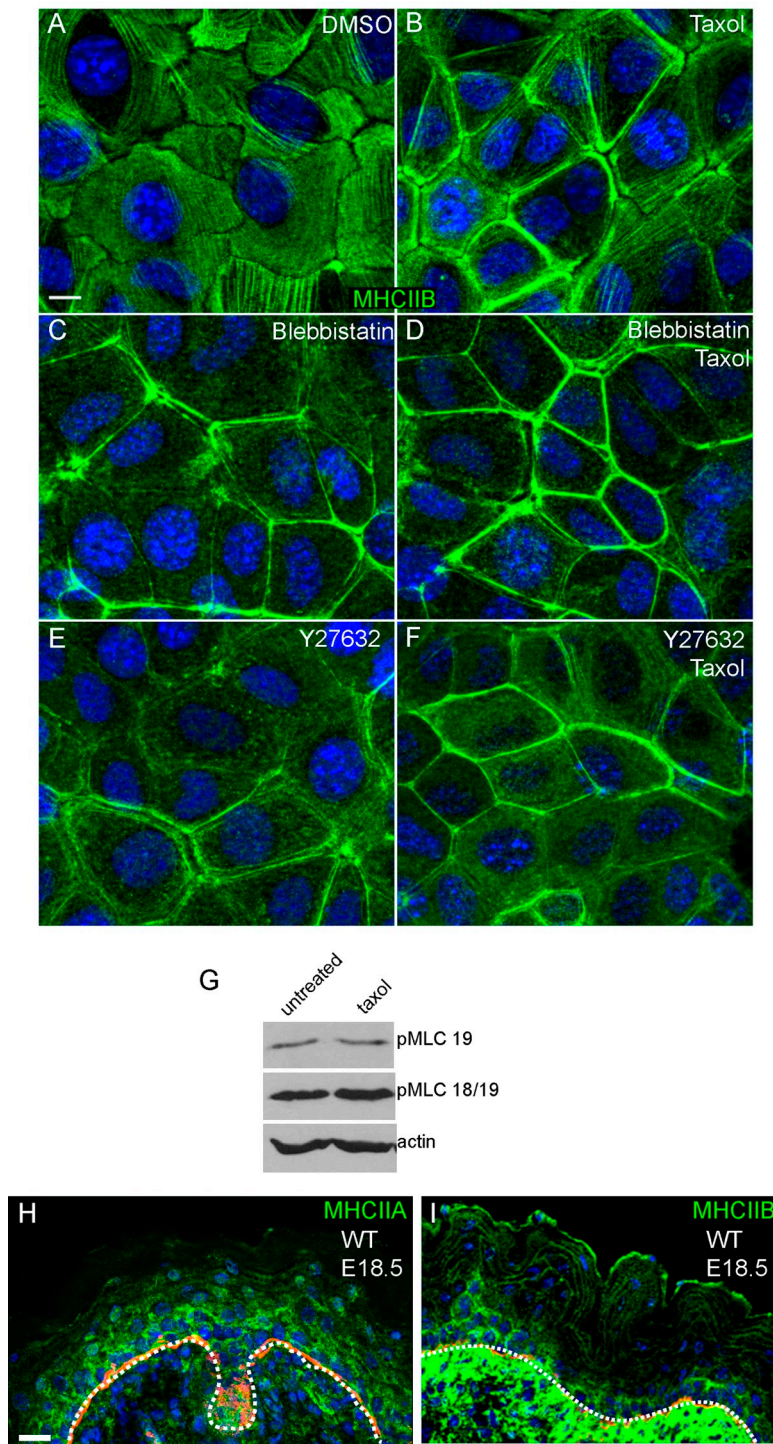

Figure S5. **Myosin II localization in vitro and in vivo.** (A–F) Myosin IIB (green) localization in cultured keratinocytes treated as indicated in the panels. Bar, 10  $\mu$ m. (G) Western blots of myosin light chain phosphorylated at either residue 19, or 18 and 19. Lysates were prepared from control and taxol-treated keratinocytes. (H) Localization of myosin IIA (MHCIIA, green) in E18.5 mouse skin. Bar, 20  $\mu$ m. (I) Localization of myosin IIB (MHCIIB, green) in E18.5 mouse skin. The dotted line marks the basement membrane in both H and I.
